# Supplementary material
Source: PubMed Central journal article supplement (PMC6485480)
Supplement: NIHMS36999-supplement-Supplementary_Figure_1.pdf [file NIHMS36999-supplement-Supplementary_Figure_1.pdf]

Supplementary  
Figure 1

I (intensity 0 to 3) x P (percentage 0-100%) = score

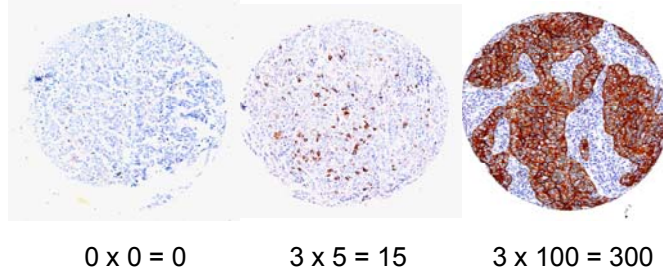

**Supplementary Figure 1:** examples of staining obtained for sLe<sup>x</sup> in TMA to illustrate the calculation of the score. Intensity of the staining was determined by cross-examination of all the cores stained for each given slide. Percentage represents the proportion of tumour cells positively stained excluding the non tumoural content of the core.
