# Supplementary material
Source: PubMed Central journal article supplement (PMC6485480)
Supplement: NIHMS36999-supplement-Supplementary_Figure_4.pdf [file NIHMS36999-supplement-Supplementary_Figure_4.pdf]

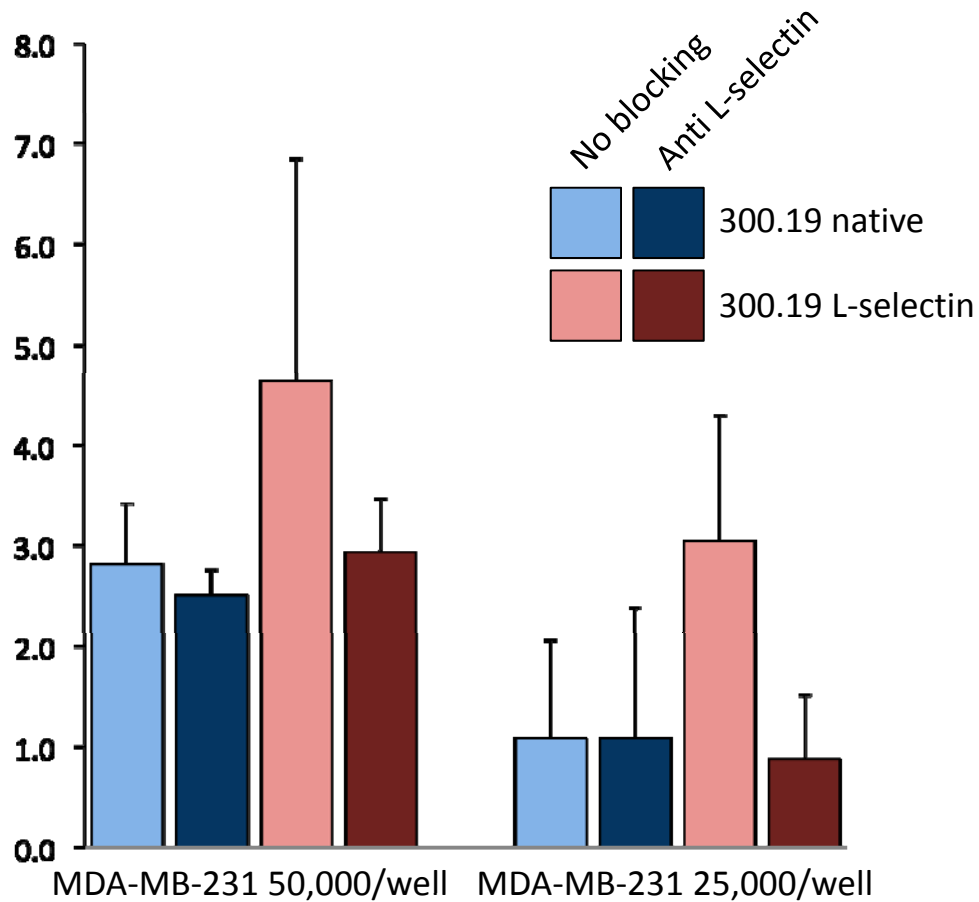

**Supplementary Figure 4:** Cell-cell adhesion in static condition. L-selectin increases cell-cell adhesion when transfected in 310.9 cells. Increased adhesion can be inhibited by specifically blocking L-selectin with a monoclonal antibody.

**Material and method**

MDA-MB-231 cells were detached using EDTA and seeded at two different densities in optical grade 96 wells culture plate (greiner), 24hrs prior to adhesion assay. The adhesion assay was performed adding 50,000 300.19 untransfected or 300.19 L-selectin per well, dyed with with 1 $\mu$ M green Cell Tracker® (Invitrogen), in suspension in DMEM containing 1% of FCS. When necessary, the anti L-selectin antibody was added at 15 $\mu$ g/mL. Cells were co-incubated 30 minutes at 37C and the monolayers subsequently washed three times using neat DMEM. The green fluorescence remaining in the wells was quantified using a Fluostar Omega plate reader (BMG Labtech) and expressed as percentage of total fluorescence on unwashed wells.
