# Supplementary material
Source: PubMed Central journal article supplement (PMC6485480)
Supplement: NIHMS36999-supplement-Supplementary_Figure_5.pdf [file NIHMS36999-supplement-Supplementary_Figure_5.pdf]

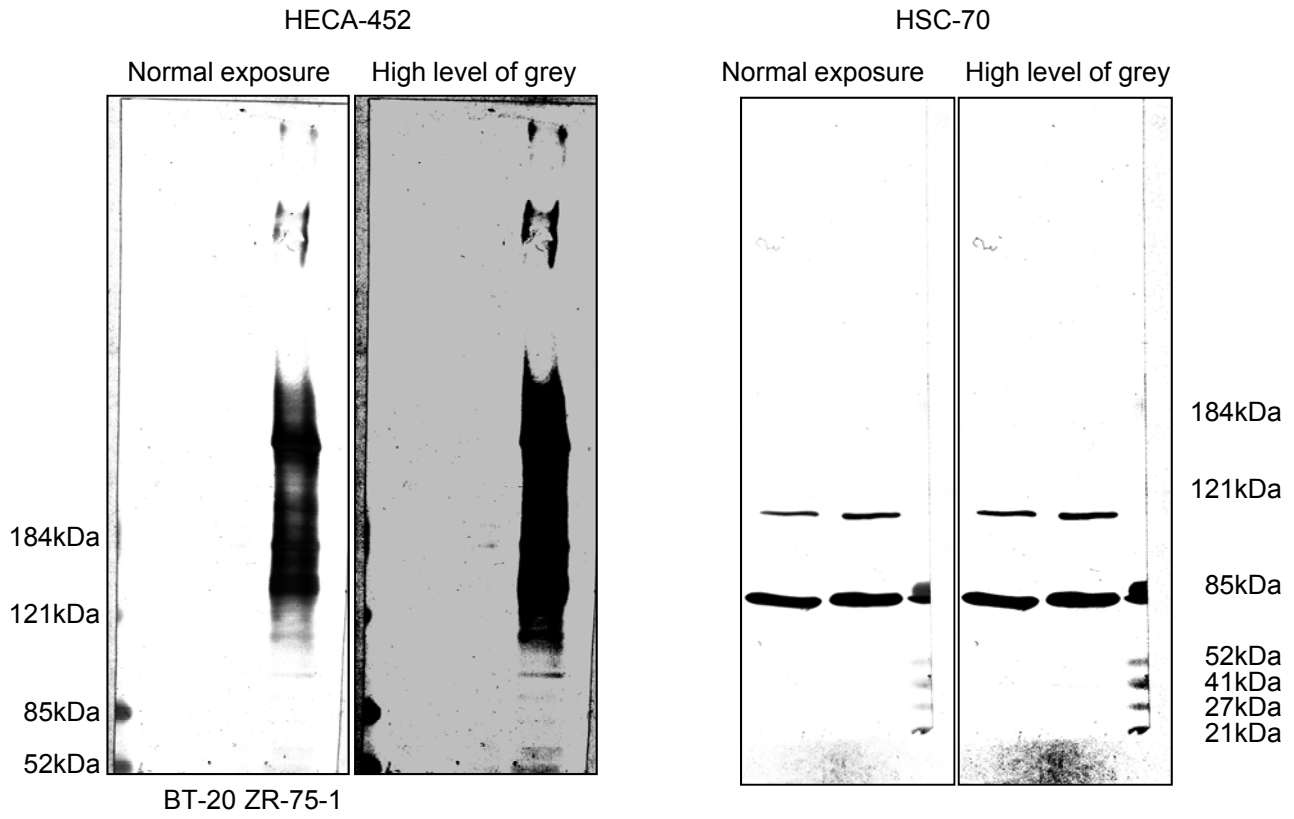

Uncropped Figure 5D

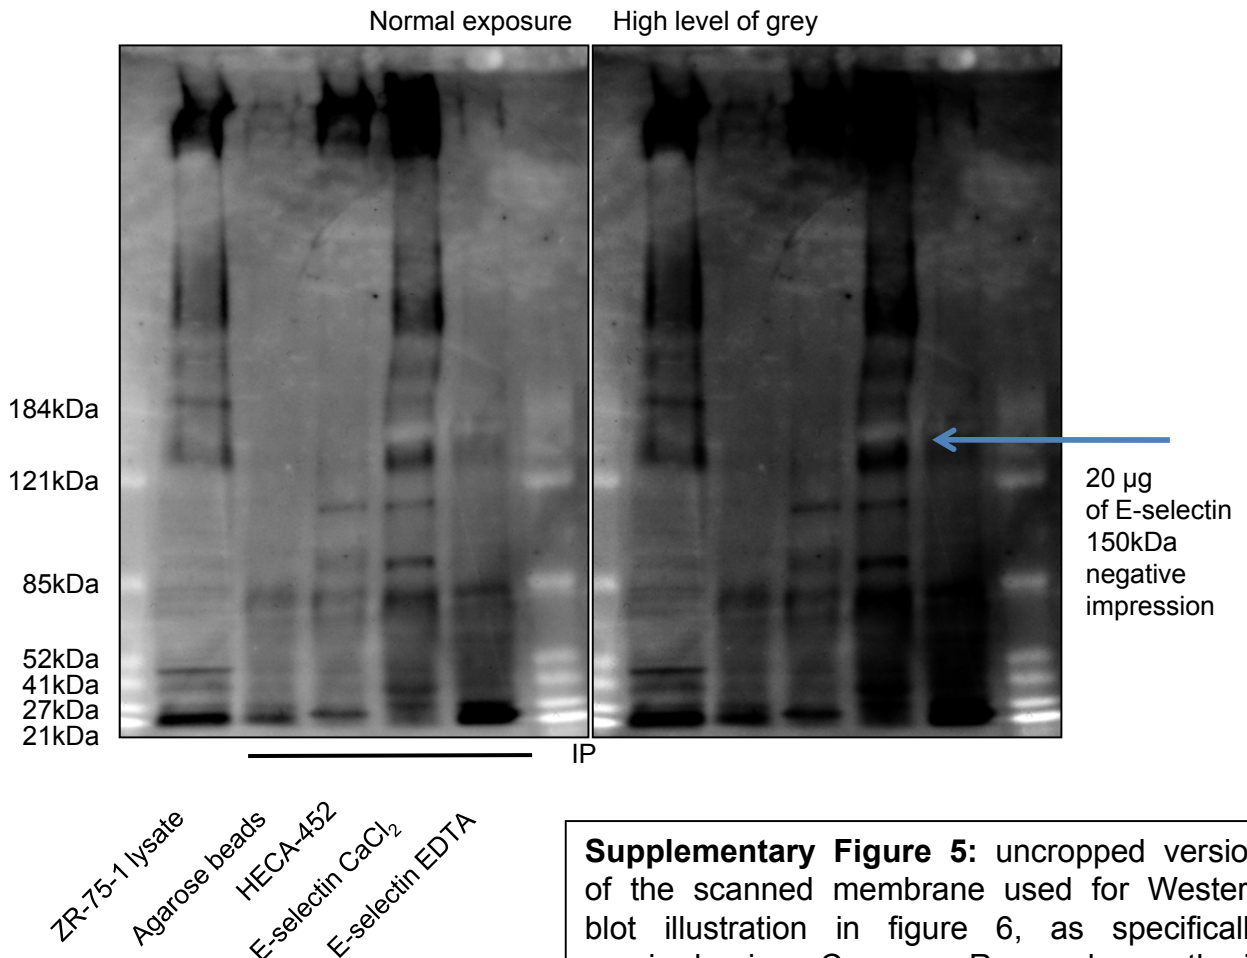

**Supplementary Figure 5:** uncropped version of the scanned membrane used for Western blot illustration in figure 6, as specifically required in Cancer Research author's instructions.
