# Supplementary material
Source: PubMed Central journal article supplement (PMC6485480)
Supplement: NIHMS36999-supplement-Supplementary_Methods_and_Results.pdf [file NIHMS36999-supplement-Supplementary_Methods_and_Results.pdf]

**LC/MS/MS analysis of SDS PAGE 1D gel bands – Identification of proteins following E-Selectin enrichment of a ZR-75-1 lysate.**

**Method**

Lysates of ZR-75-1 cells were precipitated with E-selectin in the presence or absence of calcium and run on SDS page as described above and stained with silver nitrate. Eight bands of interest defined by comparing silver nitrate staining to Western blots with anti-sialyl Le<sup>x</sup> of E-selectin IPs, were excised and subjected to in-gel reduction, alkylation and digestion with trypsin. Cysteine residues were reduced with dithiothreitol and derivatised by treatment with iodoacetamide to form stable carbamidomethyl derivatives. Trypsin digestion was carried out overnight at room temperature after initial incubation at 37°C for 2 hours.

Peptides were extracted from the gel pieces by a series of acetonitrile and aqueous washes. The extract was pooled with the initial supernatant and lyophilised. Each sample was then resuspended in 23µL of 50mM ammonium bicarbonate and analysed by LC/MS/MS. Chromatographic separations were performed using an Ultimate LC system (Dionex, UK). Peptides were resolved by reversed phase chromatography on a 75 µm C18 PepMap column using a three step linear gradient of acetonitrile in 0.1% formic acid. The gradient was delivered to elute the peptides at a flow rate of 200 nL/min over 60 min. The eluate was ionised by electrospray ionisation using a Z-spray source fitted to a QToF-micro (Waters Corp.) operating under MassLynx v4.0. The instrument was run in automated data-dependent switching mode, selecting precursor ions based on their intensity for sequencing by collision-induced fragmentation. The MS/MS analyses were conducted using collision energy profiles that were chosen based on the mass-to-charge ratio ( $m/z$ ) and the charge state of the peptide.

*Database Searching:* The mass spectral data was processed into peak lists using ProteinLynx Global Server v2.2.5 with the following parameters:

MS survey – No background subtraction, SG smoothing 2 iterations 3 channels, peaks centroided (top 80%) no de-isotoping.

MS/MS – No background subtraction, SG smoothing 2 iterations 4 channels, peak centroiding (top 80%) no de-isotoping.

The peak lists was searched against the Swiss-Prot and a concatenated Swiss-Prot database using Mascot software v2.2 (<http://www.matrixscience.com>) using the following parameter specifications:

Precursor ion mass tolerance 1.2 Da

Fragment ion mass tolerance 0.6 Da

Tryptic digest with up to three missed cleavages

Variable modifications: Acetyl (Protein N-term), Carbamidomethylation (C), Gln->pyro-glu (N-term Q) and Oxidation (M).

Sequence information was obtained for all the peptides included in the results.

## **Results**

The results of the analysis and database searches are given in Table 1 and the proteins precipitated with E-selectin in a calcium dependent manner in table 2.. Database generated files were uploaded into Scaffold 3 (v3\_00\_06) software ([www.proteomesoftware.com](http://www.proteomesoftware.com)) to create .sfd files (PR270 SJ gel Human Tax Only 21032011). All samples were aligned in this software for easier interpretation and used to validate MS/MS based peptide assignments and protein identifications. Peptide assignments were accepted if they contained at least two unique peptide assignments and were established at 100% identification probability by the Protein Prophet algorithm (Nesvizhskii, *AI Anal. Chem.* 2003 Sep 1;75(17):4646-58). The result table includes probability scores (Mowse) for each peptide identified from the protein sequence. The Threshold Identity Score corresponds to a 5% chance of incorrect assignment. Peptides identified below these probabilities were accepted following manual inspection of the raw data to ensure that fragment ions correctly match the assigned sequence.

**Table 1: LC/MS/MS analysis of 1D SDS gel bands**

| Band No.                                  | Protein I.D.                                        | Accession No.                            | MW (Da)                                                                  | Band No.                                                                 | Protein I.D.                             | Accession No.                            | MW (Da) |      |
|-------------------------------------------|-----------------------------------------------------|------------------------------------------|--------------------------------------------------------------------------|--------------------------------------------------------------------------|------------------------------------------|------------------------------------------|---------|------|
| SJ1_1+                                    | Annexin A6                                          | P0813                                    | 7582                                                                     | SJ1_51-                                                                  | Heat shock cognate 71 kDa protein        | P1114                                    | 7085    |      |
|                                           |                                                     | 3                                        | 6                                                                        |                                                                          | 2                                        | 4                                        |         |      |
|                                           |                                                     | P1114                                    | 7085                                                                     |                                                                          | Heat shock protein 75 kDa, mitochondrial | Q1293                                    | 8006    |      |
|                                           |                                                     | 2                                        | 4                                                                        |                                                                          | 1                                        | 0                                        |         |      |
|                                           |                                                     | Heat shock cognate 71 kDa protein        | Q1293                                                                    |                                                                          | 8006                                     | Heat shock 70 kDa protein 1A/1B          | P0810   | 7000 |
|                                           |                                                     | 1                                        | 0                                                                        |                                                                          | 7                                        | 9                                        |         |      |
|                                           |                                                     | Heat shock protein 75 kDa, mitochondrial | P3864                                                                    |                                                                          | 7363                                     | Actin, cytoplasmic 1                     | P6070   | 4171 |
|                                           |                                                     | 6                                        | 5                                                                        |                                                                          | 1                                        | 0                                        |         |      |
|                                           |                                                     | Stress-70 protein, mitochondrial         | P0810                                                                    |                                                                          | 7000                                     | Glyceraldehyde-3-phosphate dehydrogenase | P0440   | 3603 |
|                                           |                                                     | 7                                        | 9                                                                        |                                                                          | 6                                        | 0                                        |         |      |
|                                           |                                                     | Heat shock 70 kDa protein 1A/1B          | P0440                                                                    |                                                                          | 3603                                     | Tubulin beta-2C chain                    | P6837   | 4979 |
|                                           |                                                     | 6                                        | 0                                                                        |                                                                          | 1                                        | 9                                        |         |      |
|                                           |                                                     | Glyceraldehyde-3-phosphate dehydrogenase | P6836                                                                    |                                                                          | 5012                                     | Q9H4                                     | 7254    |      |
|                                           |                                                     | 3                                        | 0                                                                        |                                                                          | A4                                       | 9                                        |         |      |
|                                           |                                                     | Tubulin alpha-1B chain                   | P0185                                                                    |                                                                          | 3608                                     | Aminopeptidase B                         | P3864   | 7363 |
|                                           | 7                                                   | 3                                        | 6                                                                        | 5                                                                        |                                          |                                          |         |      |
|                                           | Ig gamma-1 chain C region                           | P6070                                    | 4171                                                                     | Stress-70 protein, mitochondrial                                         | P2940                                    | 6783                                     |         |      |
|                                           | 9                                                   | 0                                        | 1                                                                        | 5                                                                        |                                          |                                          |         |      |
|                                           | Actin, cytoplasmic 1                                |                                          |                                                                          | Transketolase                                                            |                                          |                                          |         |      |
|                                           |                                                     |                                          |                                                                          | Dolichyl-diphosphooligosaccharide--protein glycosyltransferase subunit 1 | P0484                                    | 6852                                     |         |      |
|                                           | Annexin A2                                          | P0735                                    | 3858                                                                     | 3                                                                        | 7                                        |                                          |         |      |
|                                           | Trifunctional enzyme subunit alpha, mitochondrial   | P4093                                    | 8294                                                                     | P6836                                                                    | 5012                                     |                                          |         |      |
|                                           |                                                     | 9                                        | 7                                                                        | 3                                                                        | 0                                        |                                          |         |      |
|                                           |                                                     |                                          |                                                                          | X-ray repair cross-complementing protein 6                               | P1295                                    | 6979                                     |         |      |
|                                           | Neuroblast differentiation-associated protein AHNAK | Q0966                                    | 6286                                                                     | 6                                                                        | 9                                        |                                          |         |      |
|                                           |                                                     | 6                                        | 99                                                                       | P0254                                                                    | 7409                                     |                                          |         |      |
|                                           | E-selectin                                          | P1658                                    | 6661                                                                     | 5                                                                        | 5                                        |                                          |         |      |
|                                           | 1                                                   | 1                                        |                                                                          |                                                                          |                                          |                                          |         |      |
|                                           |                                                     |                                          | Prelamin-A/C Trifunctional enzyme subunit alpha, mitochondrial           | P4093                                                                    | 8294                                     |                                          |         |      |
| Tubulin beta-2C chain                     | P6837                                               | 4979                                     | 9                                                                        | 7                                                                        |                                          |                                          |         |      |
|                                           | 1                                                   | 9                                        |                                                                          |                                                                          |                                          |                                          |         |      |
|                                           |                                                     |                                          | Heat shock protein HSP 90-beta V-type proton ATPase catalytic subunit A  | P0823                                                                    | 8321                                     |                                          |         |      |
| Prelamin-A/C                              | P0254                                               | 7409                                     | 8                                                                        | 2                                                                        |                                          |                                          |         |      |
|                                           | 5                                                   | 5                                        |                                                                          |                                                                          |                                          |                                          |         |      |
|                                           |                                                     |                                          | P1102                                                                    | 7228                                                                     |                                          |                                          |         |      |
| 78 kDa glucose-regulated protein          | 1                                                   | 8                                        | 6                                                                        | 0                                                                        |                                          |                                          |         |      |
|                                           | P1785                                               | 8496                                     | P0813                                                                    | 7582                                                                     |                                          |                                          |         |      |
| 6-phosphofructokinase, liver type         | 8                                                   | 4                                        | 3                                                                        | 6                                                                        |                                          |                                          |         |      |
|                                           |                                                     |                                          | Annexin A6                                                               |                                                                          |                                          |                                          |         |      |
|                                           |                                                     |                                          | Aspartyl-tRNA synthetase, mitochondrial                                  | Q6P14                                                                    | 7351                                     |                                          |         |      |
| Aminopeptidase B                          | Q9H4                                                | 7254                                     | 8                                                                        | 6                                                                        |                                          |                                          |         |      |
|                                           | A4                                                  | 9                                        |                                                                          |                                                                          |                                          |                                          |         |      |
|                                           |                                                     |                                          | P1658                                                                    | 6661                                                                     |                                          |                                          |         |      |
| Transketolase                             | P2940                                               | 6783                                     | 1                                                                        | 1                                                                        |                                          |                                          |         |      |
|                                           | 1                                                   | 5                                        |                                                                          |                                                                          |                                          |                                          |         |      |
|                                           |                                                     |                                          | E-selectin                                                               | 1                                                                        | 1                                        |                                          |         |      |
| Heterogeneous nuclear ribonucleoprotein U | Q0083                                               | 9052                                     | P0185                                                                    | 3608                                                                     |                                          |                                          |         |      |
|                                           | 9                                                   | 8                                        | 7                                                                        | 3                                                                        |                                          |                                          |         |      |
|                                           |                                                     |                                          | Ig gamma-1 chain C region                                                |                                                                          |                                          |                                          |         |      |
|                                           |                                                     |                                          | Succinate dehydrogenase [ubiquinone] flavoprotein subunit, mitochondrial | P3104                                                                    | 7264                                     |                                          |         |      |
| Bone marrow stromal antigen 2             | Q1058                                               | 1975                                     | 0                                                                        | 5                                                                        |                                          |                                          |         |      |
|                                           | 9                                                   | 6                                        |                                                                          |                                                                          |                                          |                                          |         |      |
|                                           |                                                     |                                          | L-lactate dehydrogenase A chain                                          | P0033                                                                    | 3666                                     |                                          |         |      |
| Aspartyl-tRNA synthetase, mitochondrial   | Q6P14                                               | 7351                                     | 8                                                                        | 5                                                                        |                                          |                                          |         |      |
|                                           | 8                                                   | 6                                        |                                                                          |                                                                          |                                          |                                          |         |      |
|                                           |                                                     |                                          | Heterogeneous nuclear ribonucleoprotein R                                | O4339                                                                    | 7089                                     |                                          |         |      |
|                                           |                                                     |                                          |                                                                          | 0                                                                        | 9                                        |                                          |         |      |

|             |                                          |            |           |                 |                                                               |                     |                   |
|-------------|------------------------------------------|------------|-----------|-----------------|---------------------------------------------------------------|---------------------|-------------------|
|             |                                          |            |           |                 | Pyruvate kinase isozymes M1/M2                                | P1461<br>8          | 5790<br>0         |
|             |                                          |            |           |                 | Heat shock protein HSP 90-alpha                               | P0790<br>0          | 8460<br>7         |
|             |                                          |            |           |                 | Phosphoglycerate kinase 1                                     | P0055<br>8<br>P2070 | 4458<br>6<br>6636 |
|             |                                          |            |           |                 | Lamin-B1                                                      | 0                   | 8                 |
|             |                                          |            |           |                 | Long-chain-fatty-acid--CoA ligase 3                           | O9557<br>3          | 8036<br>8         |
|             |                                          |            |           |                 | Delta-1-pyrroline-5-carboxylate synthase                      | P5488<br>6<br>P2352 | 8724<br>8<br>1849 |
|             |                                          |            |           |                 | Cofilin-1                                                     | 8                   | 1                 |
|             |                                          |            |           |                 | Pyridoxal-dependent decarboxylase domain-containing protein 1 | Q6P99<br>6          | 8665<br>2         |
|             |                                          |            |           |                 | Elongation factor Tu, mitochondrial                           | P4941<br>1          | 4951<br>0         |
|             |                                          |            |           |                 | Prolyl endopeptidase                                          | P4814<br>7          | 8064<br>8         |
|             |                                          |            |           |                 | Heterogeneous nuclear ribonucleoprotein U                     | Q0083<br>9          | 9052<br>8         |
|             |                                          |            |           |                 | 40S ribosomal protein Xaa-Pro                                 | P4678<br>2          | 2286<br>2         |
|             |                                          |            |           |                 | aminopeptidase 1                                              | Q9NQ<br>W7          | 6987<br>3         |
|             |                                          |            |           |                 | Glucose-6-phosphate isomerase                                 | P0674<br>4          | 6310<br>7         |
| SJ1_2<br>2+ | Heat shock protein HSP 90-alpha          | P0790<br>0 | 8460<br>7 | SJ1<br>_6<br>2- | Heat shock protein HSP 90-alpha                               | P0790<br>0          | 8460<br>7         |
|             | Heat shock protein HSP 90-beta           | P0823<br>8 | 8321<br>2 |                 | Heat shock protein HSP 90-beta                                | P0823<br>8          | 8321<br>2         |
|             | Actin, cytoplasmic 1                     | P6070<br>9 | 4171<br>0 |                 | Actin, cytoplasmic 1                                          | P6070<br>9          | 4171<br>0         |
|             | E-selectin                               | P1658<br>1 | 6661<br>1 |                 | Elongation factor 2                                           | P1363<br>9          | 9527<br>7         |
|             | 6-phosphofructokinase type C             | Q0181<br>3 | 8554<br>2 |                 | Tubulin beta-2C chain                                         | P6837<br>1          | 4979<br>9         |
|             | Tubulin alpha-1B chain                   | P6836<br>3 | 5012<br>0 |                 | Glyceraldehyde-3-phosphate dehydrogenase                      | P0440<br>6<br>P1658 | 3603<br>0<br>6661 |
|             | Glyceraldehyde-3-phosphate dehydrogenase | P0440<br>6 | 3603<br>0 |                 | E-selectin                                                    | 1                   | 1                 |
|             | Tubulin beta-2C chain                    | P6837<br>1 | 4979<br>9 |                 | Tubulin alpha-1B chain                                        | P6836<br>3          | 5012<br>0         |
|             | Galectin-3-binding protein               | Q0838<br>0 | 6528<br>9 |                 | Transitional endoplasmic reticulum ATPase                     | P5507<br>2          | 8926<br>6         |
|             | Annexin A6                               | P0813<br>3 | 7582<br>6 |                 | Ig gamma-1 chain C region                                     | P0185<br>7          | 3608<br>3         |
|             | Ig gamma-1 chain C region                | P0185<br>7 | 3608<br>3 |                 | Aconitate hydratase, mitochondrial                            | Q9979<br>8          | 8537<br>2         |
|             | Elongation factor 2                      | P1363<br>9 | 9527<br>7 |                 | Heat shock protein 75 kDa, mitochondrial                      | Q1293<br>1          | 8006<br>0         |
|             | Delta-1-pyrroline-5-carboxylate synthase | P5488<br>6 | 8724<br>8 |                 | Pyridoxal-dependent decarboxylase domain-containing protein 1 | Q6P99<br>6          | 8665<br>2         |
|             | Annexin A2                               | P0735<br>5 | 3858<br>0 |                 | Delta-1-pyrroline-5-carboxylate synthase                      | P5488<br>6          | 8724<br>8         |
|             | Aconitate hydratase, mitochondrial       | Q9979<br>8 | 8537<br>2 |                 | Sodium/potassium-transporting ATPase subunit                  | P0502<br>3          | 1128<br>24        |

|        |                                                               |       |      |          |                                                   |       |      |
|--------|---------------------------------------------------------------|-------|------|----------|---------------------------------------------------|-------|------|
|        |                                                               | O9490 | 3781 |          | alpha-1                                           |       |      |
|        | Erlin-2                                                       | 5     | 5    |          | Coatomer subunit beta'                            | P3560 | 1024 |
|        | Neuroblast differentiation-associated protein AHNAK           | Q0966 | 6286 |          | 6                                                 | 6     | 22   |
|        |                                                               | 6     | 99   |          | Elongation factor Tu, mitochondrial               | P4941 | 4951 |
|        |                                                               |       |      |          | 6-                                                |       |      |
|        | Importin subunit beta-1                                       | Q1497 | 9710 |          | phosphofructokinase type C                        | Q0181 | 8554 |
|        |                                                               | 4     | 8    |          | 3                                                 | 3     | 2    |
|        | Elongation factor 1-alpha 1                                   | P6810 | 5010 |          | Importin subunit beta-1                           | Q1497 | 9710 |
|        |                                                               | 4     | 9    |          | 4                                                 | 4     | 8    |
|        |                                                               |       |      |          | Carnitine O-palmitoyltransferase 1, liver isoform | P5041 | 8831 |
|        | Protein transport protein Sec23B                              | Q1543 | 8642 |          | 6                                                 | 6     | 1    |
|        |                                                               | 7     | 4    |          | Coatomer subunit alpha                            | P5362 | 1382 |
|        | Glucose-6-phosphate isomerase                                 | P0674 | 6310 |          | 1                                                 | 1     | 58   |
|        |                                                               | 4     | 7    |          | Elongation factor 1-alpha 1                       | P6810 | 5010 |
|        | DNA replication licensing factor MCM4                         | P3399 | 9649 |          | 4                                                 | 4     | 9    |
|        |                                                               | 1     | 8    |          | Protein transport protein Sec23B                  | Q1543 | 8642 |
|        | Cofilin-1                                                     | P2352 | 1849 |          | 7                                                 | 7     | 4    |
|        |                                                               | 8     | 1    |          | Sorbitol dehydrogenase                            | Q0079 | 3830 |
|        | Coronin-1B                                                    | Q9BR  | 5420 |          | 6                                                 | 6     | 0    |
|        |                                                               | 76    | 0    |          | Eukaryotic initiation factor 4A-1                 | P6084 | 4612 |
|        |                                                               |       |      |          | 2                                                 | 2     | 5    |
|        | DNA replication licensing factor MCM7                         | P3399 | 8125 |          | DNA replication licensing factor MCM4             | P3399 | 9649 |
|        |                                                               | 3     | 7    |          | 1                                                 | 1     | 8    |
|        | Pyridoxal-dependent decarboxylase domain-containing protein 1 | Q6P99 | 8665 |          | O9490                                             | O9490 | 3781 |
|        |                                                               | 6     | 2    |          | 5                                                 | 5     | 5    |
|        | Elongation factor Tu, mitochondrial                           | P4941 | 4951 |          | Erlin-2                                           |       |      |
|        |                                                               | 1     | 0    |          | L-lactate dehydrogenase A chain                   | P0033 | 3666 |
|        |                                                               |       |      |          | 8                                                 | 8     | 5    |
|        | Endoplasmin                                                   | P1462 | 9241 |          | P1462                                             | P1462 | 9241 |
|        |                                                               | 5     | 1    |          | 5                                                 | 5     | 1    |
|        | Heterogeneous nuclear ribonucleoprotein U                     | Q0083 | 9052 |          | Endoplasmin                                       | P2352 | 1849 |
|        |                                                               | 9     | 8    |          | 8                                                 | 8     | 1    |
|        | Glutamyl-tRNA synthetase                                      | P4789 | 8774 |          | Cofilin-1                                         |       |      |
|        |                                                               | 7     | 3    |          | DNA replication licensing factor MCM7             | P3399 | 8125 |
|        |                                                               |       |      |          | 3                                                 | 3     | 7    |
|        |                                                               |       |      |          | Heterogeneous nuclear ribonucleoprotein U         | Q0083 | 9052 |
|        |                                                               |       |      |          | 9                                                 | 9     | 8    |
|        |                                                               |       |      |          | Q9BR                                              | Q9BR  | 5420 |
|        |                                                               |       |      |          | 76                                                | 76    | 0    |
|        |                                                               |       |      |          | Coronin-1B                                        |       |      |
|        |                                                               |       |      |          | Phosphoglycerate kinase 1                         | P0055 | 4458 |
|        |                                                               |       |      |          | 8                                                 | 8     | 6    |
|        |                                                               |       |      |          | Chloride intracellular channel protein 1          | O0029 | 2690 |
|        |                                                               |       |      |          | 9                                                 | 9     | 6    |
|        |                                                               |       |      |          | 40S ribosomal protein S5                          | P4678 | 2286 |
|        |                                                               |       |      |          | 2                                                 | 2     | 2    |
|        |                                                               |       |      |          | ATP synthase subunit alpha, mitochondrial         | P2570 | 5971 |
|        |                                                               |       |      |          | 5                                                 | 5     | 4    |
|        |                                                               |       |      |          | Glutamyl-tRNA synthetase                          | P4789 | 8774 |
|        |                                                               |       |      |          | 7                                                 | 7     | 3    |
|        |                                                               |       |      |          |                                                   |       |      |
| SJ1_3+ |                                                               | P6837 | 4979 | SJ1_7-3- |                                                   |       |      |
|        | Tubulin beta-2C chain                                         | 1     | 9    |          | Tubulin beta-2C chain                             | P6837 | 4979 |
|        |                                                               | P6836 | 5012 |          | 1                                                 | 1     | 9    |
|        | Tubulin alpha-1B chain                                        | 3     | 0    |          | Actin, cytoplasmic 1                              | P6070 | 4171 |
|        |                                                               | P0440 | 3603 |          | 9                                                 | 9     | 0    |
|        | Glyceraldehyde-3-phosphate dehydrogenase                      | 6     | 0    |          | Tubulin alpha-1B chain                            | P6836 | 5012 |
|        |                                                               |       |      |          | 3                                                 | 3     | 0    |
|        |                                                               |       |      |          | Puromycin-sensitive aminopeptidase                | P5578 | 1032 |
|        | E-selectin                                                    | P1658 | 6661 |          | 6                                                 | 6     | 11   |
|        |                                                               | 1     | 1    |          | P1462                                             | P1462 | 9241 |
|        | Actin, cytoplasmic 1                                          | P6070 | 4171 |          | 5                                                 | 5     | 1    |
|        |                                                               | 9     | 0    |          | Endoplasmin                                       |       |      |
|        |                                                               |       |      |          | Glyceraldehyde-3-phosphate dehydrogenase          | P0440 | 3603 |
|        | Annexin A2                                                    | P0735 | 3858 |          | 6                                                 | 6     | 0    |
|        |                                                               | 5     | 0    |          | P1658                                             | P1658 | 6661 |
|        | Neuroblast differentiation-associated protein AHNAK           | Q0966 | 6286 |          | 1                                                 | 1     | 1    |
|        |                                                               | 6     | 99   |          |                                                   |       |      |

|             |                                                     |       |      |             |                                                     |       |      |
|-------------|-----------------------------------------------------|-------|------|-------------|-----------------------------------------------------|-------|------|
|             |                                                     | P0185 | 3608 |             | Transitional endoplasmic reticulum ATPase           | P5507 | 8926 |
|             | Ig gamma-1 chain C region                           | 7     | 3    |             | Heat shock protein HSP 90-beta                      | P0823 | 8321 |
|             | Alanyl-tRNA synthetase, cytoplasmic                 | P4958 | 1067 |             |                                                     | 8     | 2    |
|             | Ubiquitin carboxyl-terminal hydrolase 5             | P4597 | 9572 |             | Hexokinase-1                                        | P1936 | 1024 |
|             |                                                     | 4     | 5    |             | Ubiquitin carboxyl-terminal hydrolase 5             | 7     | 20   |
|             | Neutral alpha-glucosidase AB                        | Q1469 | 1068 |             |                                                     | P4597 | 9572 |
|             |                                                     | 7     | 07   |             |                                                     | 4     | 5    |
|             | Puromycin-sensitive aminopeptidase                  | P5578 | 1032 |             | Fatty acid synthase                                 | P4932 | 2732 |
|             |                                                     | 6     | 11   |             | Pyruvate kinase isozymes M1/M                       | 7     | 54   |
|             | Cofilin-1                                           | P2352 | 1849 |             |                                                     | P1461 | 5790 |
|             |                                                     | 8     | 1    |             |                                                     | 8     | 0    |
|             | Bone marrow stromal antigen 2                       | Q1058 | 1975 |             | Alpha-actinin-4                                     | O4370 | 1047 |
|             |                                                     | 9     | 6    |             | Ig gamma-1 chain C region                           | 7     | 88   |
|             | Heat shock protein HSP 90-alpha                     | P0790 | 8460 |             |                                                     | P0185 | 3608 |
|             |                                                     | 0     | 7    |             |                                                     | 7     | 3    |
|             |                                                     |       |      |             | Alpha-actinin-1                                     | P1281 | 1029 |
|             |                                                     |       |      |             | Uncharacterized protein KIAA0090                    | 4     | 93   |
|             |                                                     |       |      |             | Elongation factor Tu, mitochondrial                 | Q8N76 | 1116 |
|             |                                                     |       |      |             | Ubiquitin-like modifier-activating enzyme 1         | 6     | 89   |
|             |                                                     |       |      |             |                                                     | P4941 | 4951 |
|             |                                                     |       |      |             |                                                     | 1     | 0    |
|             |                                                     |       |      |             | Catenin alpha-1                                     | P2231 | 1177 |
|             |                                                     |       |      |             | L-lactate dehydrogenase A chain                     | 4     | 74   |
|             |                                                     |       |      |             |                                                     | P3522 | 1000 |
|             |                                                     |       |      |             |                                                     | 1     | 09   |
|             |                                                     |       |      |             | Alanyl-tRNA synthetase, cytoplasmic                 | P0033 | 3666 |
|             |                                                     |       |      |             | Neutral alpha-glucosidase AB                        | 8     | 5    |
|             |                                                     |       |      |             |                                                     | P4958 | 1067 |
|             |                                                     |       |      |             | Cofilin-1                                           | 8     | 43   |
|             |                                                     |       |      |             | Staphylococcal nuclease domain-containing protein 1 | Q1469 | 1068 |
|             |                                                     |       |      |             | Glucose-6-phosphate isomerase                       | 7     | 07   |
|             |                                                     |       |      |             |                                                     | P2352 | 1849 |
|             |                                                     |       |      |             |                                                     | 8     | 1    |
|             |                                                     |       |      |             | Coronin-7                                           | Q7KZ  | 1019 |
|             |                                                     |       |      |             | 40S ribosomal protein S5                            | F4    | 34   |
|             |                                                     |       |      |             | Chloride intracellular channel protein 1            | P0674 | 6310 |
|             |                                                     |       |      |             | Importin subunit beta-1                             | 4     | 7    |
|             |                                                     |       |      |             | DNA replication licensing factor MCM3               | P5773 | 1005 |
|             |                                                     |       |      |             |                                                     | 7     | 42   |
|             |                                                     |       |      |             | Exportin-T                                          | P4678 | 2286 |
|             |                                                     |       |      |             | Dihydrolipoyl dehydrogenase, mitochondrial          | 2     | 2    |
|             |                                                     |       |      |             | Extended synaptotagmin-1                            | O0029 | 2690 |
|             |                                                     |       |      |             |                                                     | 9     | 6    |
|             |                                                     |       |      |             |                                                     | Q1497 | 9710 |
|             |                                                     |       |      |             |                                                     | 4     | 8    |
|             |                                                     |       |      |             |                                                     | P2520 | 9092 |
|             |                                                     |       |      |             |                                                     | 5     | 4    |
|             |                                                     |       |      |             |                                                     | O4359 | 1098 |
|             |                                                     |       |      |             |                                                     | 2     | 93   |
|             |                                                     |       |      |             |                                                     | P0962 | 5414 |
|             |                                                     |       |      |             |                                                     | 2     | 3    |
|             |                                                     |       |      |             |                                                     | Q9BSJ | 1227 |
|             |                                                     |       |      |             |                                                     | 8     | 80   |
| SJ1_4<br>4+ | E-selectin                                          | P1658 | 6661 | SJ1_8<br>4- | E-selectin                                          | P1658 | 6661 |
|             | Ig gamma-1 chain C region                           | P0185 | 3608 |             | Fatty acid synthase                                 | P4932 | 2732 |
|             | Neuroblast differentiation-associated protein AHNAK | Q0966 | 6286 |             | Tubulin beta-2C chain                               | P6837 | 4979 |
|             |                                                     | 6     | 99   |             | Actin, cytoplasmic 1                                | P6070 | 4171 |
|             | Actin, cytoplasmic 1                                | P6070 | 4171 |             |                                                     | 9     | 0    |
|             |                                                     | 9     | 0    |             | Ig gamma-1 chain                                    | P0185 | 3608 |
|             | Tubulin alpha-1B chain                              | P6836 | 5012 |             |                                                     |       |      |

|  |                                          |       |      |                                           |       |      |
|--|------------------------------------------|-------|------|-------------------------------------------|-------|------|
|  |                                          | 3     | 0    | C region                                  | 7     | 3    |
|  |                                          | P6837 | 4979 | Glyceraldehyde-3-phosphate dehydrogenase  | P0440 | 3603 |
|  | Tubulin beta-2C chain                    | 1     | 9    | Heat shock protein HSP 90-beta            | P0823 | 8321 |
|  |                                          | P0440 | 3603 | Heat shock protein HSP 90-alpha           | P0790 | 8460 |
|  | Glyceraldehyde-3-phosphate dehydrogenase | 6     | 0    | ATP-dependent RNA helicase A              | Q0821 | 1408 |
|  |                                          | P4932 | 2732 | Transitional endoplasmic reticulum ATPase | P5507 | 8926 |
|  | Fatty acid synthase                      | 7     | 54   | Pyruvate kinase isozymes M1/M2            | P1461 | 5790 |
|  |                                          | Q0821 | 1408 | Tubulin alpha-1B chain                    | P6836 | 5012 |
|  | ATP-dependent RNA helicase A             | 1     | 69   |                                           | 3     | 0    |
|  |                                          | P0790 | 8460 |                                           |       |      |
|  | Heat shock protein HSP 90-alpha          | 0     | 7    |                                           |       |      |
|  |                                          | Q9BR  | 5420 |                                           |       |      |
|  | Coronin-1B                               | 76    | 0    |                                           |       |      |
|  |                                          | P0735 | 3858 |                                           |       |      |
|  | Annexin A2                               | 5     | 0    |                                           |       |      |

**Table 2: List of proteins IP in a calcium specific manner.**

| Protein                                             |       | ID     | Size   | Localisation  | Function                              |
|-----------------------------------------------------|-------|--------|--------|---------------|---------------------------------------|
| Annexin A2                                          | Human | P07355 | 38580  | secreted      | Membrane binding (Ca dependent)       |
| Neuroblast differentiation-associated protein AHNAK | Human | Q09666 | 628699 | nucleus       | Neurona differentiation (Ca depedent) |
| 78 kDa glucose-regulated protein                    | Human | P11021 | 72288  | ER            | Assembly of protein multimer          |
| 6-phosphofructokinase, liver type                   | Human | P17858 | 84964  | Cytosol       | Glycan catabolism                     |
| Bone marrow stromal antigen 2                       | Human | Q10589 | 19756  | Cell membrane | Virus caption                         |
| Galectin-3-binding protein                          | Human | Q08380 | 65289  | secreted      | Cell adhesion                         |
