# Supplementary material
Source: PubMed Central journal article supplement (PMC6485480)

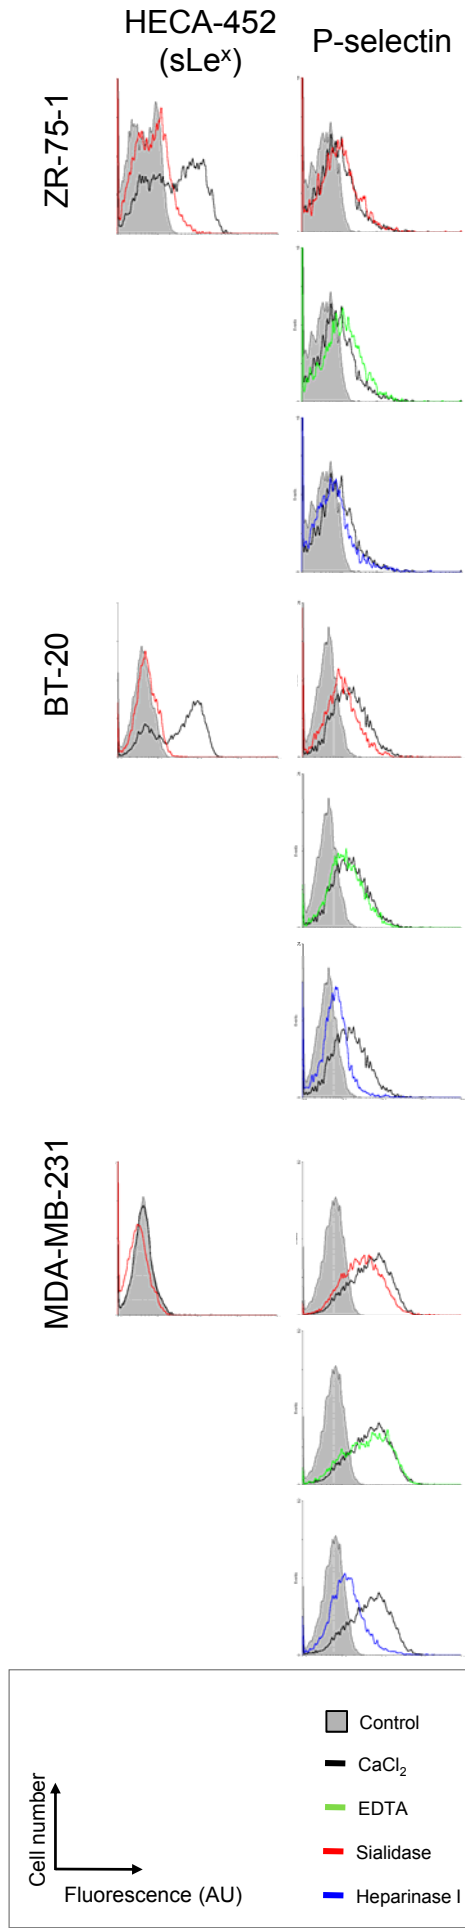

Supplement: NIHMS36999-supplement-Supplementary_Figure_3.pdf [file NIHMS36999-supplement-Supplementary_Figure_3.pdf]
